# Supplementary material for: Growth of novel boron-rich nanocrystals from oxygen-deficient borophosphosilicate glasses for boron neutron capture therapy
Source: Royal Society of Chemistry journal article supplement (doi:10.1039/c5ra18500a), 2015-01-01
Supplement: c5ra18500a1.pdf [file c5ra18500a1.pdf]

## Supporting Information

# Growth of Novel Boron-Rich Nanocrystals from Oxygen-Deficient Borophosphosilicate Glasses for Boron Neutron Capture Therapy

*Hiroshi Sugimoto, Kenji Imakita, Minoru Fujii\**

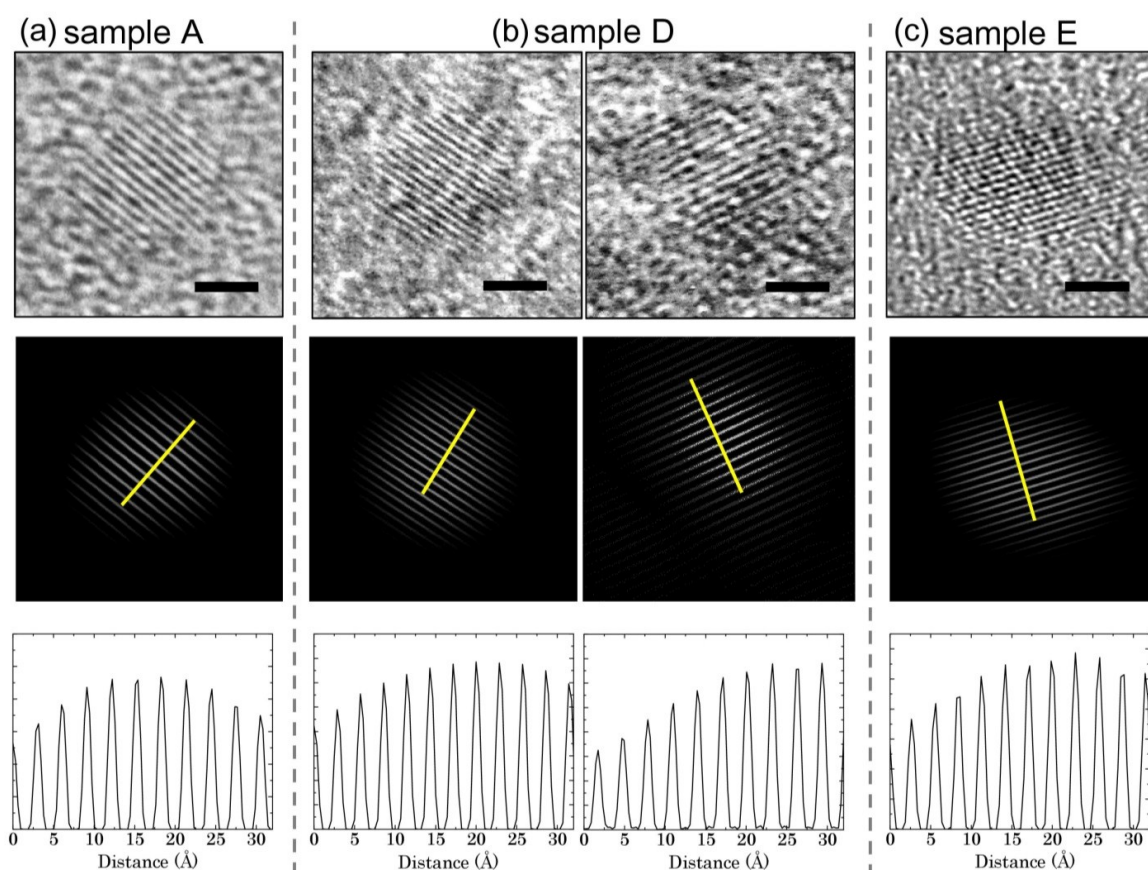

**Figure S1.** HRTEM images of (a) sample A, (b) sample D and (c) sample E. (Middle part) Inverse fast Fourier transform images after FFT of (a)-(c) and selecting bright spots. (Bottom part) Intensity profiles along the yellow lines in the images of the middle part.

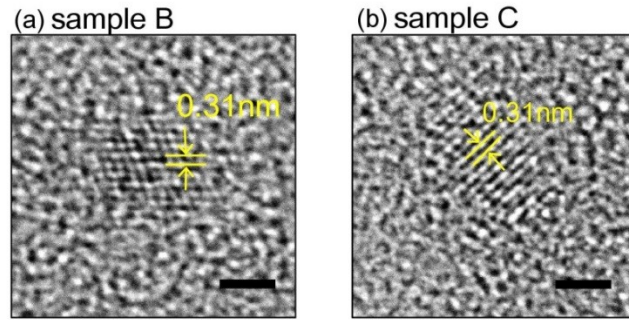

**Figure S2.** Typical HRTEM images of (a) sample B and (b) sample C. The scale bars are 2 nm.

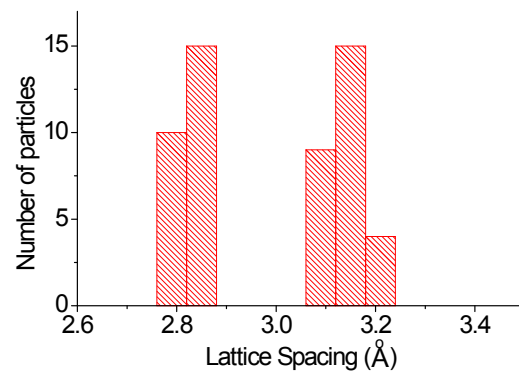

**Figure S3.** Distribution of lattice spacing of nanocrystals in sample D.
